# Supplementary material for: Modeling Drosophila Positional Preferences in Open Field Arenas with Directional Persistence and Wall Attraction
Source: PubMed Central journal article supplement (PMC3468593; doi:10.1371/journal.pone.0046570), 2012-10-10
Supplement: pone.0046570.s012.pdf [file pone.0046570.s012.pdf]

**Table S1:  $\chi^2$  test to check if  $P(r|\theta)$  is independent of  $\theta$ .** The distributions for five different  $\theta$  were compared using a  $\chi^2$  test. The table indicates the  $\chi^2$  statistic values. For all comparisons,  $df = 30$ ,  $p < 0.0001$ . Each column and row represents a turn angle as indicated.

|                      | $\theta = 0^\circ$ | $\theta = 30^\circ$ | $\theta = 60^\circ$ | $\theta = 120^\circ$ | $\theta = 180^\circ$ |
|----------------------|--------------------|---------------------|---------------------|----------------------|----------------------|
| $\theta = 0^\circ$   |                    | 0.1481e+008         | 0.3877e+008         | 0.5216e+008          | 0.6137e+008          |
| $\theta = 30^\circ$  | 0.2195e+008        |                     | 0.0879e+008         | 0.1800e+008          | 0.2509e+008          |
| $\theta = 60^\circ$  | 0.8170e+008        | 0.1250e+008         |                     | 0.0275e+008          | 0.0664e+008          |
| $\theta = 120^\circ$ | 1.3410e+008        | 0.3133e+008         | 0.0323e+008         |                      | 0.0114e+008          |
| $\theta = 180^\circ$ | 1.3958e+008        | 0.3970e+008         | 0.0753e+008         | 0.0105e+008          |                      |
