# Supplementary material for: Modeling Drosophila Positional Preferences in Open Field Arenas with Directional Persistence and Wall Attraction
Source: PubMed Central journal article supplement (PMC3468593; doi:10.1371/journal.pone.0046570), 2012-10-10
Supplement: pone.0046570.s013.pdf [file pone.0046570.s013.pdf]

**Table S2:**  $\chi^2$  test to check if  $P(\theta|\mathbf{r})$  is independent of  $\mathbf{r}$ . The distributions for five different step size were compared using a  $\chi^2$  test. The table indicates the  $\chi^2$  statistic values. For all comparisons,  $df = 20$ ,  $p < 0.0001$ . Each column and row represents a step size as indicated in bold.

|                    | <b>r = 0.015cm</b> | <b>r = 0.054cm</b> | <b>r = 0.093cm</b> | <b>r = 0.350cm</b> |
|--------------------|--------------------|--------------------|--------------------|--------------------|
| <b>r = 0.015cm</b> |                    | 0.5767e+008        | 0.6215e+008        | 0.6390e+008        |
| <b>r = 0.054cm</b> | 1.7876e+008        |                    | 0.0078e+008        | 0.0143e+008        |
| <b>r = 0.093cm</b> | 1.7468e+008        | 0.0087e+008        |                    | 0.0035e+008        |
| <b>r = 0.350cm</b> | 1.5588e+008        | 0.0159e+008        | 0.0032e+008        |                    |
