# Supplementary material for: Modeling Drosophila Positional Preferences in Open Field Arenas with Directional Persistence and Wall Attraction
Source: PubMed Central journal article supplement (PMC3468593; doi:10.1371/journal.pone.0046570), 2012-10-10
Supplement: pone.0046570.s014.pdf [file pone.0046570.s014.pdf]

**Table S3: Statistical comparison between the directional persistent probabilities of different genotypes.** In the table, the first column indicates a pair of genotypes and the second column shows the result of the  $\chi^2$  test for comparing  $P(r, \theta)$  for the two genotypes.

| Two genotypes                                   | Statistical test                              |
|-------------------------------------------------|-----------------------------------------------|
| <i>gprk1<sup>KO9a</sup>, w<sup>1118</sup></i>   | $\chi^2 = 16844, p < 0.001, df = 488$         |
| <i>gprk1<sup>KO9a</sup>, norpA<sup>7</sup></i>  | $\chi^2 = 36520, p < 0.001, df=490$           |
| <i>gprk1<sup>KO9a</sup>, rut<sup>2080</sup></i> | $\chi^2 = 10347, p < 0.001, df = 382$         |
| <i>w<sup>1118</sup>, norpA<sup>7</sup></i>      | $\chi^2 = 42468, p < 0.001, df = 474$         |
| <i>w<sup>1118</sup>, rut<sup>2080</sup></i>     | $\chi^2 = 18147, p < 0.001, df = 372$         |
| <i>norpA<sup>7</sup>, rut<sup>2080</sup></i>    | $\chi^2 = 86413, p < 0.001, df = 375$         |
| Canton-S, <i>rut<sup>2080</sup></i>             | $\chi^2 = 3.1289e + 007, p < 0.001, df = 573$ |
| Canton-S, <i>w<sup>1118</sup></i>               | $\chi^2 = 2.1182e + 009, p < 0.001, df = 555$ |
| Canton-S, <i>norpA<sup>7</sup></i>              | $\chi^2 = 1.7497e + 008, p < 0.001, df = 560$ |
| Canton-S, <i>gprk1<sup>KO9a</sup></i>           | $\chi^2 = 5.3981e + 007, p < 0.001, df = 539$ |
