# Supplementary material for: Modeling Drosophila Positional Preferences in Open Field Arenas with Directional Persistence and Wall Attraction
Source: PubMed Central journal article supplement (PMC3468593; doi:10.1371/journal.pone.0046570), 2012-10-10
Supplement: pone.0046570.s015.pdf [file pone.0046570.s015.pdf]

**Table S4: Percentage of movements in the central zone constrained by small turn angles.**  
 The percentage was computed from the directional persistent probability. The first column indicate the genotype, the remaining columns indicate the % of movements less than turn angles 30°, 60° and 90°.

| <b>Genotype</b>              | <b>30°</b> | <b>60°</b> | <b>90°</b> |
|------------------------------|------------|------------|------------|
| <i>w</i> <sup>1118</sup>     | 57.84%     | 65.65%     | 70.32%     |
| <i>norpA</i> <sup>7</sup>    | 81.92%     | 89.42%     | 91.72%     |
| <i>rut</i> <sup>2080</sup>   | 72.92%     | 80.20%     | 84.33%     |
| <i>gprk1</i> <sup>KO9a</sup> | 70.77%     | 79.53%     | 84.34%     |
